# Supplementary material for: Electrostatic vs. electronic interactions within oxidized multinuclear Pt(bipyridine)(dithiolene) complexes
Source: Royal Society of Chemistry journal article supplement (doi:10.1039/d4dt02514h), 2024-01-01
Supplement: d4dt02514h1.pdf [file d4dt02514h1.pdf]

## Supporting Information

### **Electrostatic vs Electronic interactions within oxidized multinuclear Pt(bipyridine)(dithiolene) complexes**

Khalil Youssef, Antoine Vacher, Thanaphon Khruewatthanawet, Thierry Roisnel , Frédéric  
Barrière, Dominique Lorcy\*

## Table of content

|                                                                                                                                              |     |
|----------------------------------------------------------------------------------------------------------------------------------------------|-----|
| <b>Fig. S1:</b> Side view of <b>3</b>                                                                                                        | p3  |
| <b>Fig. S2:</b> Side view of proligand <b>7</b>                                                                                              | p3  |
| <b>Fig. S3:</b> Cyclic voltammogram of <b>PtP</b>                                                                                            | p4  |
| <b>Fig. S4:</b> Cyclic voltammogram of <b>Pt<sub>2</sub>Fl</b>                                                                               | p4  |
| <b>Fig. S5:</b> Cyclic voltammogram of <b>Pt<sub>3</sub>1,3,5-P</b>                                                                          | p5  |
| <b>Fig. S6:</b> Cyclic voltammogram of <b>Pt<sub>3</sub>1,3,5-P</b> [NBu <sub>4</sub> ][BArF]                                                | p5  |
| <b>Fig. S7:</b> Cyclic voltammogram of <b>Pt<sub>2</sub>1,3-P</b> and <b>Pt<sub>2</sub>1,4-P</b> (scan rate)                                 | p6  |
| <b>Fig. S8:</b> Differential UV-vis-NIR spectra of <b>PtP</b>                                                                                | p6  |
| <b>Fig. S9:</b> UV-vis-NIR spectrum of Oxidized <b>Pt<sub>2</sub>1,3-P</b> and <b>Pt<sub>3</sub>1,3,5-P</b> complexes                        | p7  |
| <b>Fig. S10:</b> Differential UV-vis-NIR spectra of <b>Pt<sub>3</sub>1,3,5-P</b>                                                             | p7  |
| <b>Fig. S11:</b> Differential UV-vis-NIR spectra of <b>Pt<sub>2</sub>1,3-P</b> , <b>Pt<sub>2</sub>1,4-P</b> and <b>Pt<sub>3</sub>1,3,5-P</b> | p8  |
| <b>Fig. S12:</b> Frontier molecular orbitals for <b>Pt<sub>2</sub>1,3-P</b>                                                                  | p8  |
| <b>Fig. S13:</b> <sup>1</sup> H RMN of <b>3</b>                                                                                              | p9  |
| <b>Fig. S14:</b> <sup>13</sup> C RMN of <b>3</b>                                                                                             | p9  |
| <b>Fig. S15:</b> <sup>1</sup> H RMN of <b>4</b>                                                                                              | p10 |
| <b>Fig. S16:</b> <sup>13</sup> C RMN of <b>4</b>                                                                                             | p10 |
| <b>Fig. S17:</b> <sup>1</sup> H RMN of <b>6</b>                                                                                              | p11 |
| <b>Fig. S18:</b> <sup>13</sup> C RMN of <b>6</b>                                                                                             | p11 |
| <b>Fig. S19:</b> <sup>1</sup> H RMN of <b>7</b>                                                                                              | p12 |
| <b>Fig. S20:</b> <sup>13</sup> C RMN of <b>7</b>                                                                                             | p12 |
| <b>Fig. S21:</b> <sup>1</sup> H RMN of <b>8</b>                                                                                              | p13 |
| <b>Fig. S22:</b> <sup>1</sup> H RMN of <b>Pt<sub>2</sub>1,3-P</b>                                                                            | p13 |
| <b>Fig. S23:</b> <sup>13</sup> C RMN of <b>Pt<sub>2</sub>1,3-P</b>                                                                           | p14 |
| <b>Fig. S24:</b> <sup>1</sup> H RMN of <b>Pt<sub>2</sub>1,4-P</b>                                                                            | p14 |
| <b>Fig. S25:</b> <sup>13</sup> C RMN of <b>Pt<sub>2</sub>1,4-P</b>                                                                           | p15 |
| <b>Fig. S26:</b> <sup>1</sup> H RMN of <b>Pt<sub>2</sub>Fl</b>                                                                               | p15 |
| <b>Fig. S27:</b> <sup>13</sup> C RMN of <b>Pt<sub>2</sub>Fl</b>                                                                              | p16 |
| <b>Fig. S28:</b> <sup>1</sup> H RMN of <b>Pt<sub>3</sub>1,3,5-P</b>                                                                          | p16 |

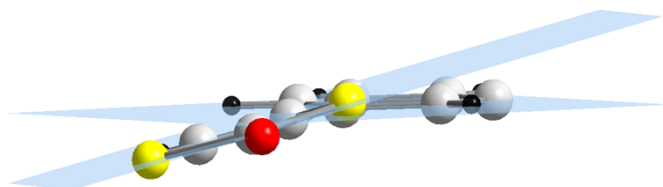

**Fig. S1:** Side view of 1,3-bis(dithiol-2-one) **3** with the central phenyl ring in the horizontal plane and the dithiole ring in the other one, the angle between the planes amounts to  $14.2(2)^\circ$ .

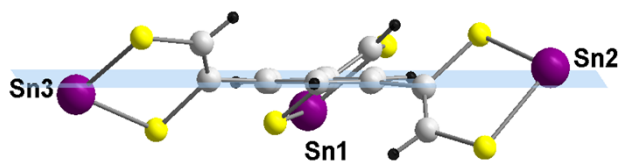

**Fig. S2:** Side view of compound **7** with the central phenyl ring in the horizontal plane showing the angles between the metalladithiolene planes and the phenyl ring plane rings in the range of  $35.4(5)^\circ - 49.1(3)^\circ$ . Butyl chains have been omitted for clarity

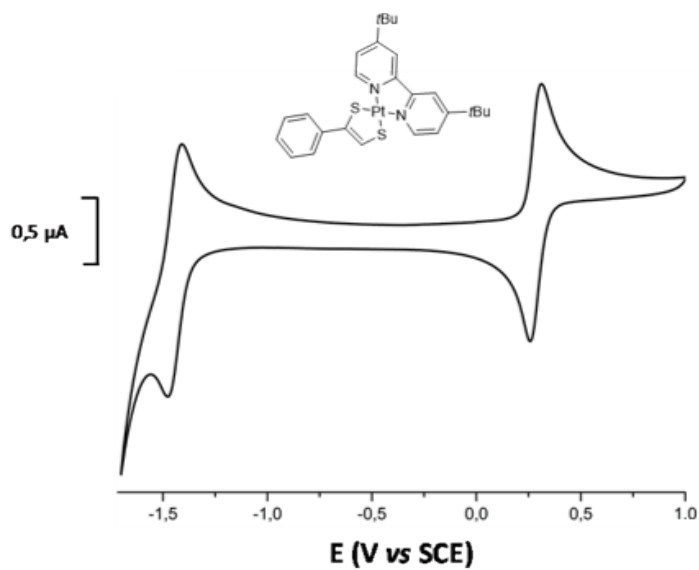

**Fig. S3:** Cyclic voltammogram of **PtP** in  $\text{CH}_2\text{Cl}_2$  using 0.1 M of  $[\text{NBu}_4][\text{PF}_6]$  as supporting electrolytes.  $v=100 \text{ mV}\cdot\text{s}^{-1}$ .

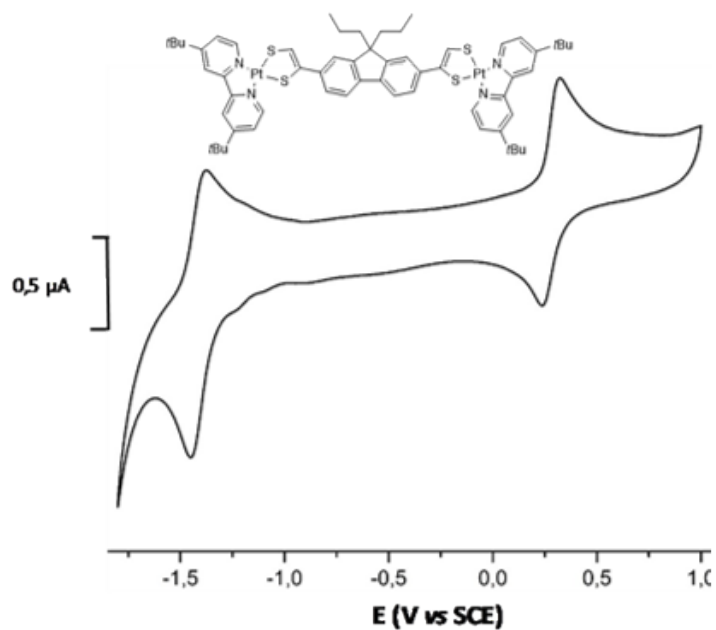

**Fig. S4:** Cyclic voltammogram of **Pt<sub>2</sub>FI** in  $\text{CH}_2\text{Cl}_2$  using 0.1 M of  $[\text{NBu}_4][\text{PF}_6]$  as supporting electrolytes.  $v=100 \text{ mV}\cdot\text{s}^{-1}$ .

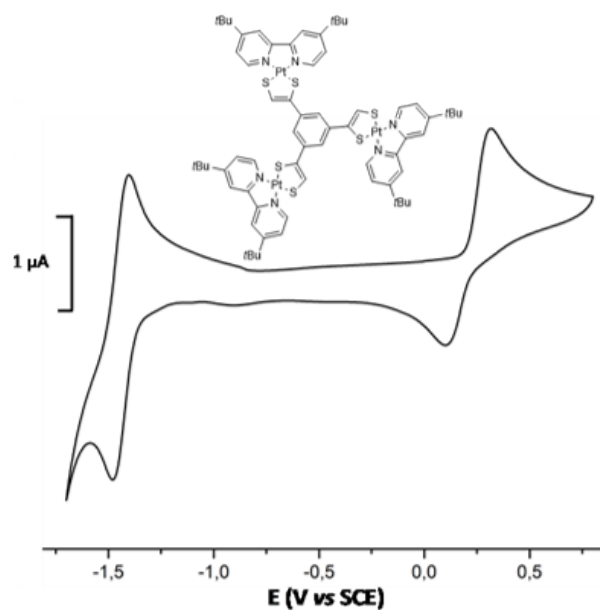

**Fig. S5:** Cyclic voltammogram of **Pt<sub>3</sub>1,3,5-P** in CH<sub>2</sub>Cl<sub>2</sub> using 0.1 M of [NBu<sub>4</sub>][PF<sub>6</sub>] as supporting electrolytes.  $v=100 \text{ mV}\cdot\text{s}^{-1}$ .

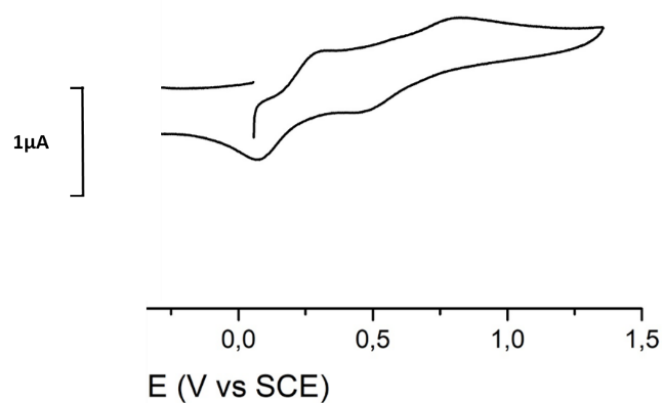

**Fig. S6:** Cyclic voltammogram of **Pt<sub>3</sub>1,3,5-P** in CH<sub>2</sub>Cl<sub>2</sub> using 0.005 M of [NBu<sub>4</sub>][BARF] as supporting electrolytes.  $v=100 \text{ mV}\cdot\text{s}^{-1}$ .

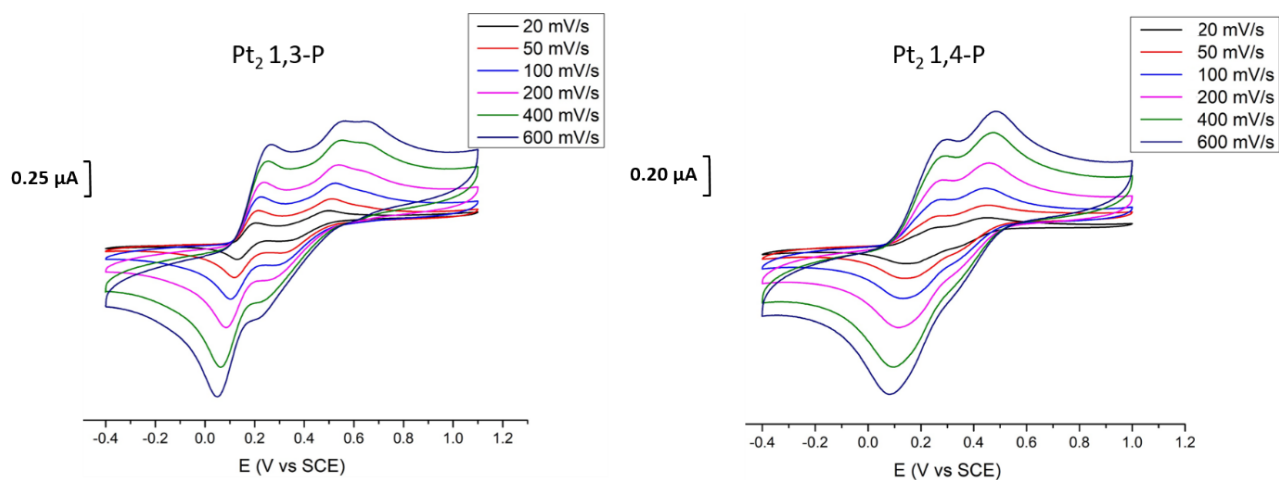

**Fig. S7:** Cyclic voltammogram of **Pt<sub>2</sub>1,3-P** (left) and **Pt<sub>2</sub>1,4-P** (right) in CH<sub>2</sub>Cl<sub>2</sub> using 0.005 M of [NBu<sub>4</sub>][BArF] as supporting electrolytes. 20 mV/s < v < 600 mV/s.

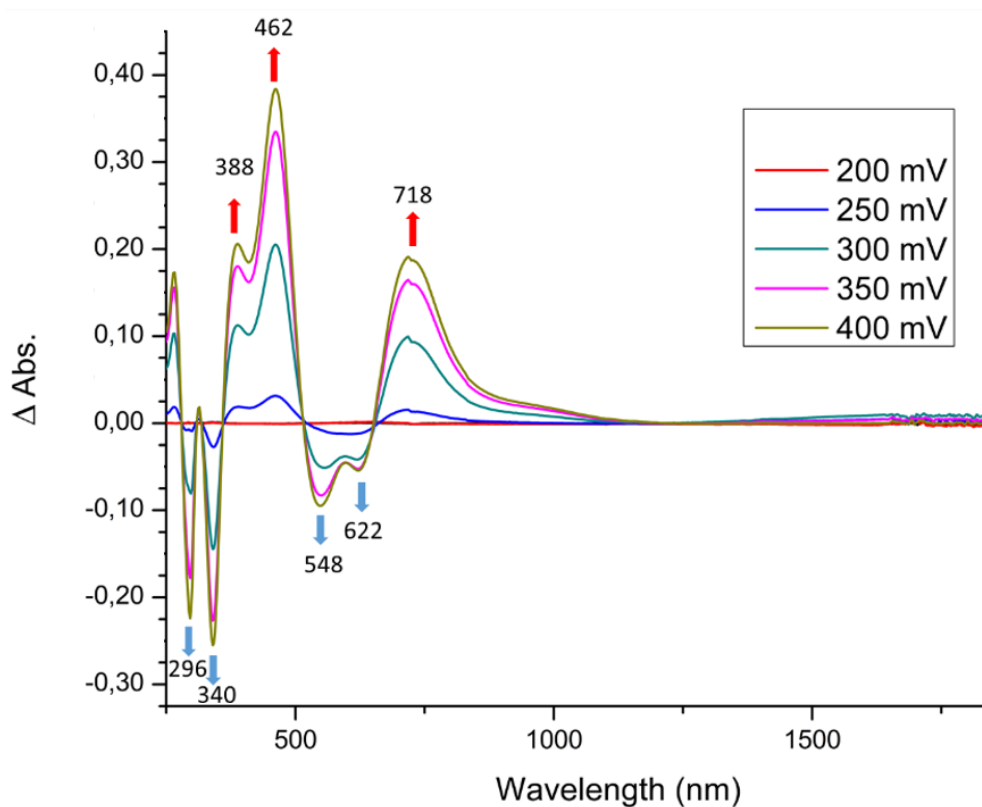

**Fig. S8:** Differential UV-vis-NIR spectra of **PtP** monitored upon gradual oxidation of the neutral complex with 0.2 M [Bu<sub>4</sub>N][PF<sub>6</sub>] as the supporting electrolyte.

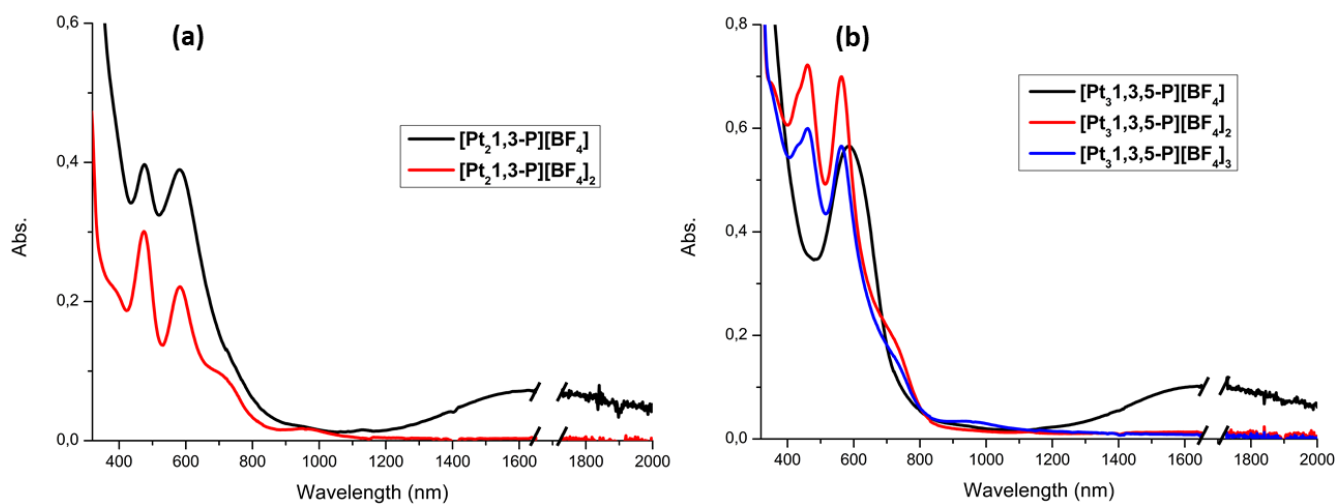

**Fig. S9:** UV-vis-NIR spectrum of Oxidized  $\text{Pt}_2\text{1,3-P}$  and  $\text{Pt}_3\text{1,3,5-P}$  complexes.

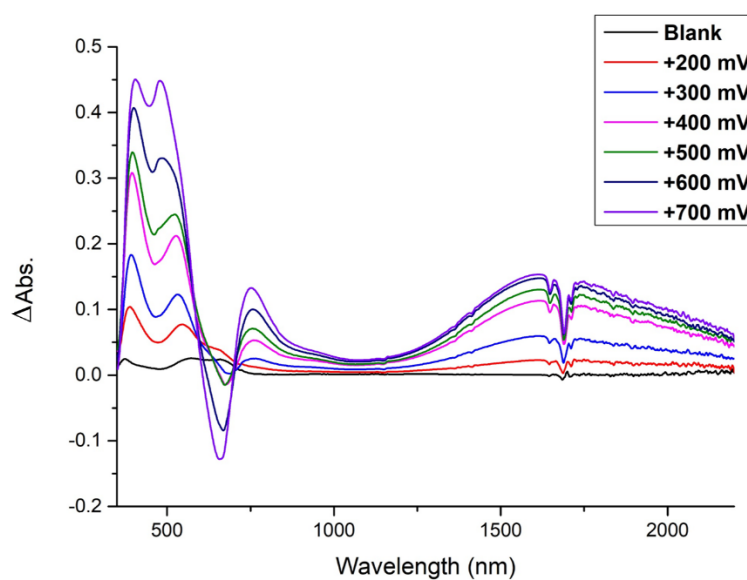

**Fig. S10:** Differential UV-vis-NIR spectra of  $\text{Pt}_3\text{1,3,5-P}$  monitored upon gradual oxidation of the neutral complex with 0.005 M  $[\text{Bu}_4\text{N}][\text{BArF}]$  as the supporting electrolyte.

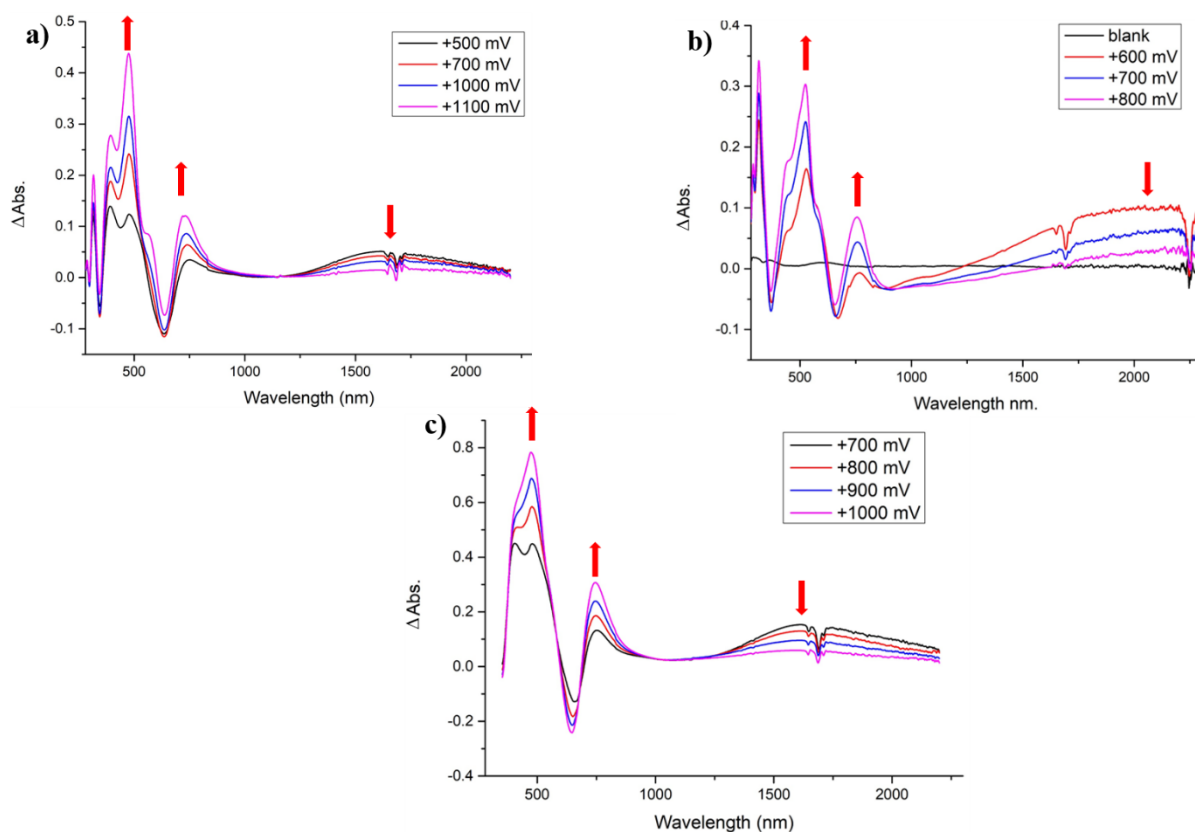

**Fig. S11:** Differential UV-vis-NIR spectra of **Pt<sub>2</sub>1,3-P** (a), **Pt<sub>2</sub>1,4-P** (b) and **Pt<sub>3</sub>1,3,5-P** (c) monitored upon gradual oxidation with 0.005 M [Bu<sub>4</sub>N][BARf] as the supporting electrolyte.

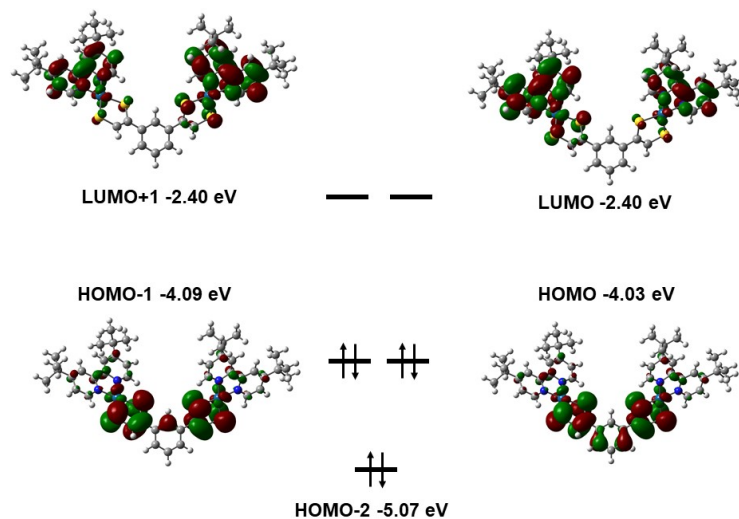

**Fig. S12:** Frontier molecular orbitals (HOMO, HOMO-1, LUMO and LUMO+1) and calculated energy levels for complex **Pt<sub>2</sub>1,3-P**.



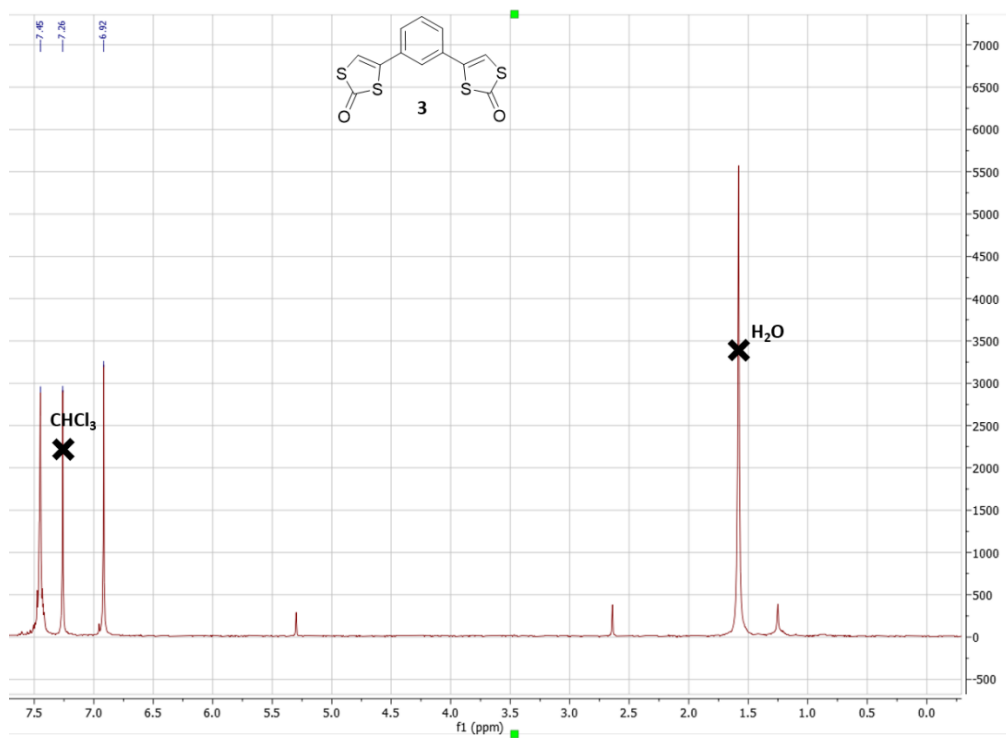

Fig. S13: <sup>1</sup>H RMN of 3

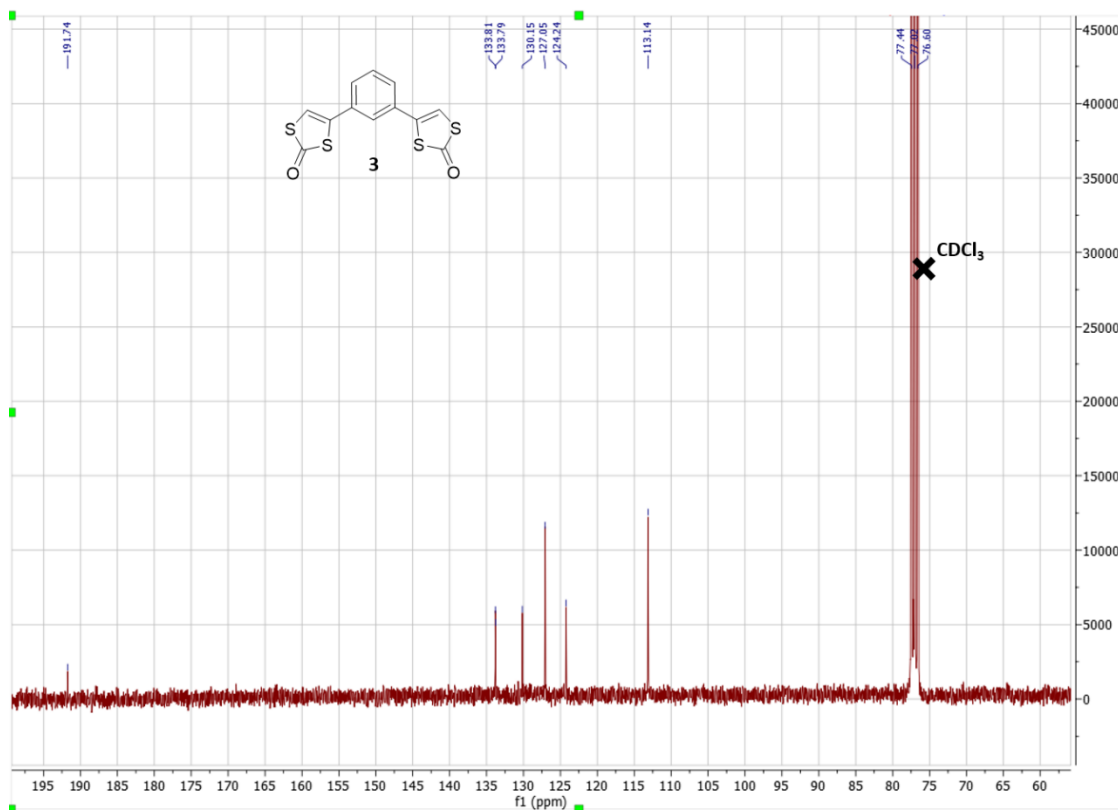

Fig. S14: <sup>13</sup>C RMN of 3

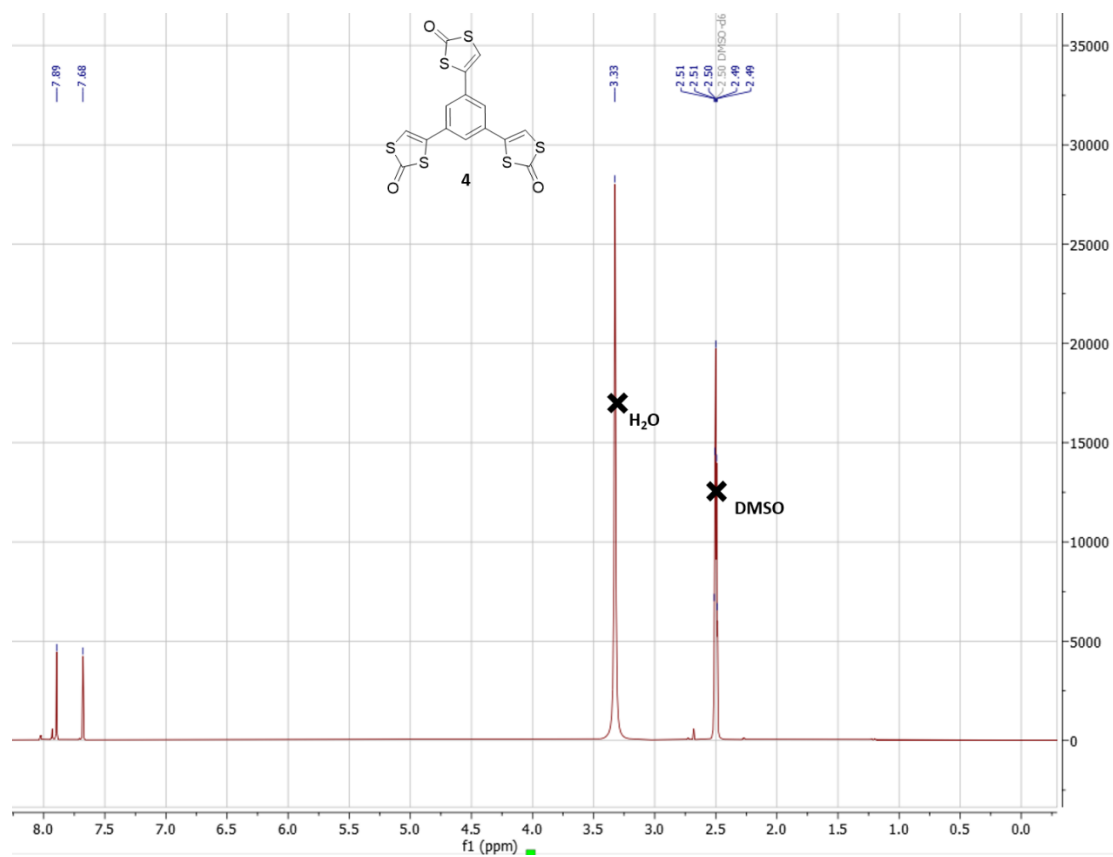

Fig. S15:  $^1\text{H}$  RMN of 4

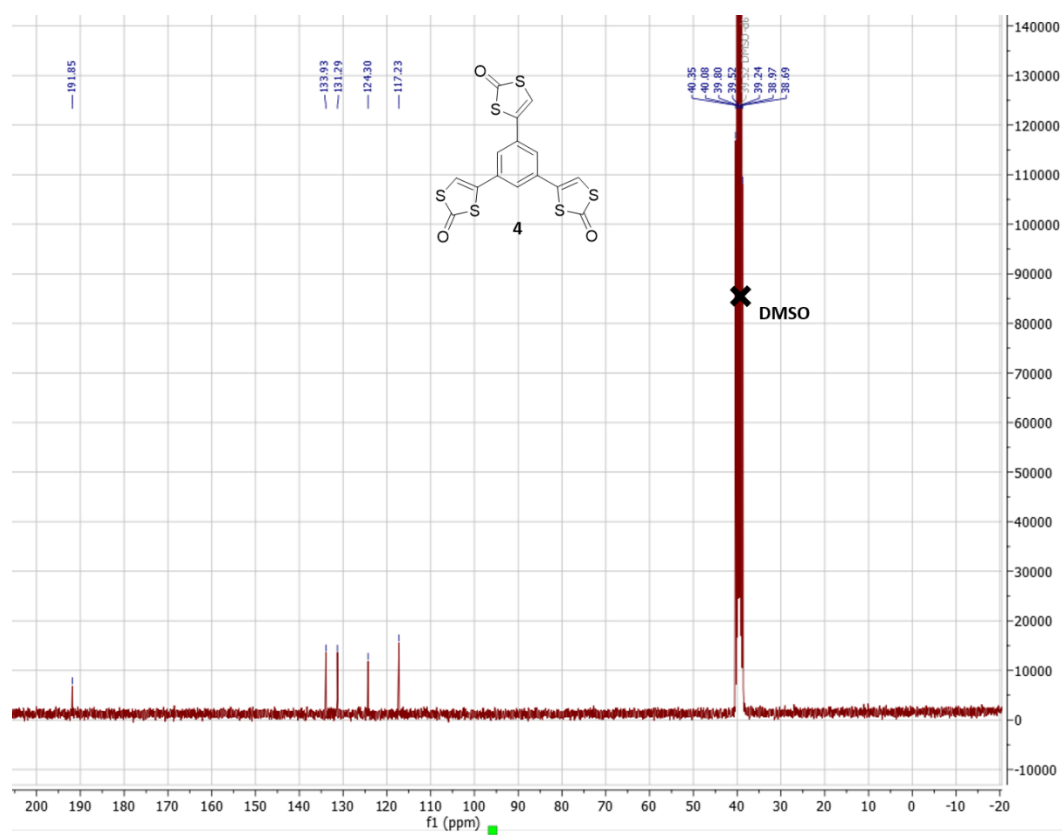

Fig. S16:  $^{13}\text{C}$  RMN of 4

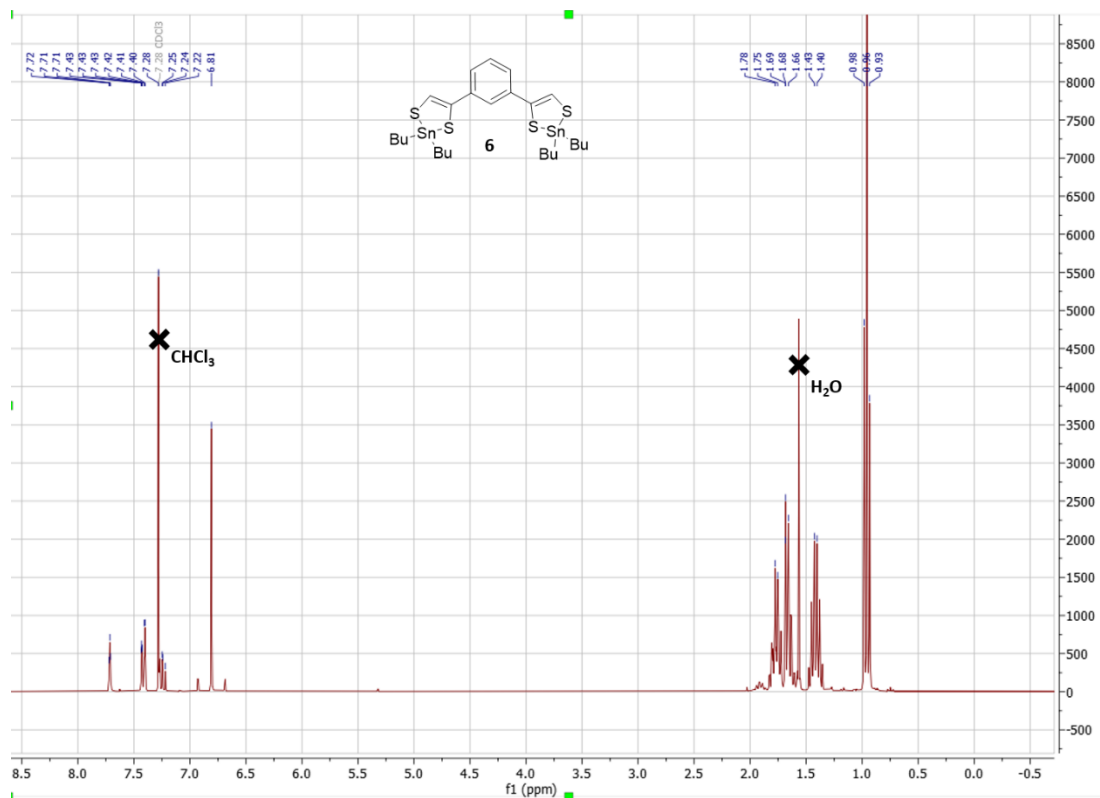

Fig. S17:  $^1\text{H}$  RMN of **6**

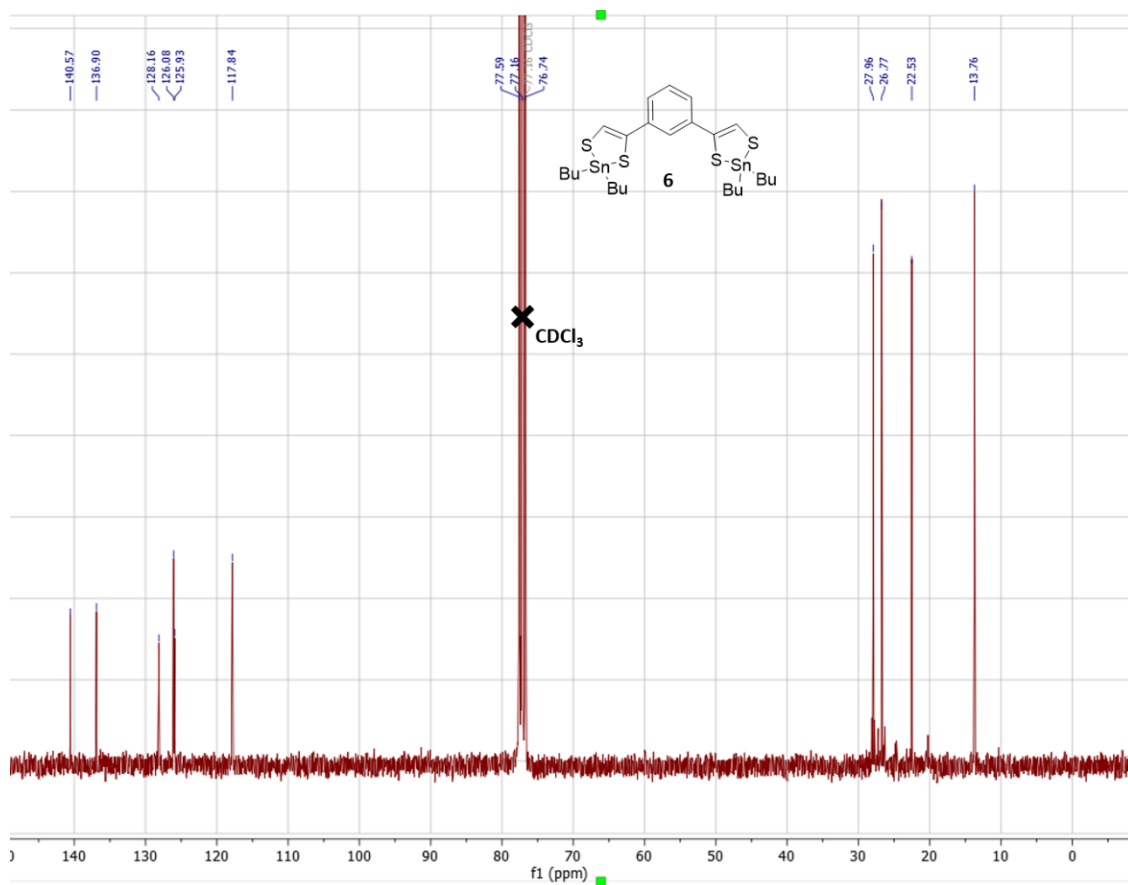

Fig. S18:  $^{13}\text{C}$  RMN of **6**

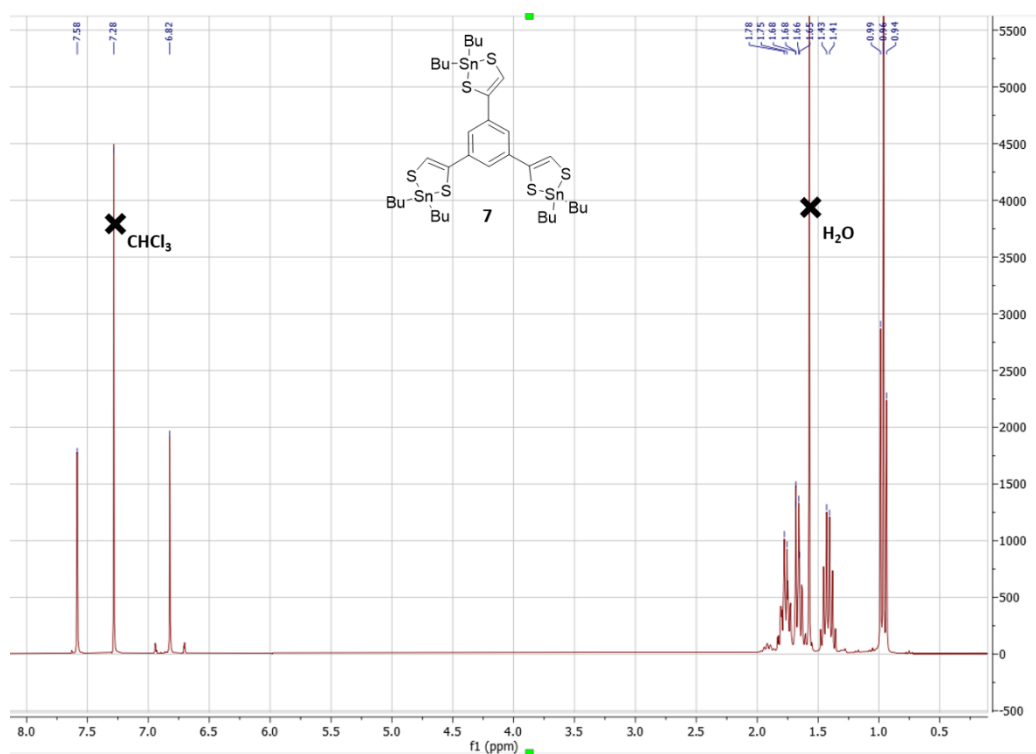

Fig. S19:  $^1\text{H}$  RMN of 7

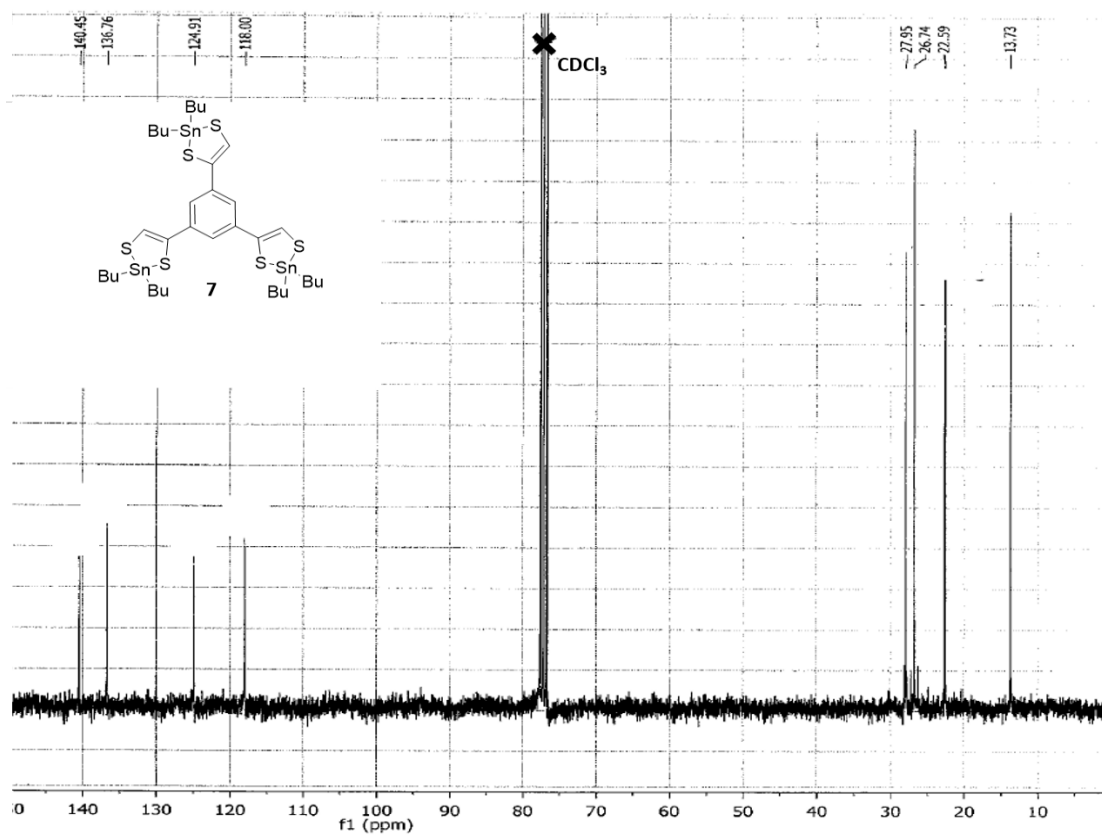

Fig. S20:  $^{13}\text{C}$  RMN of 7

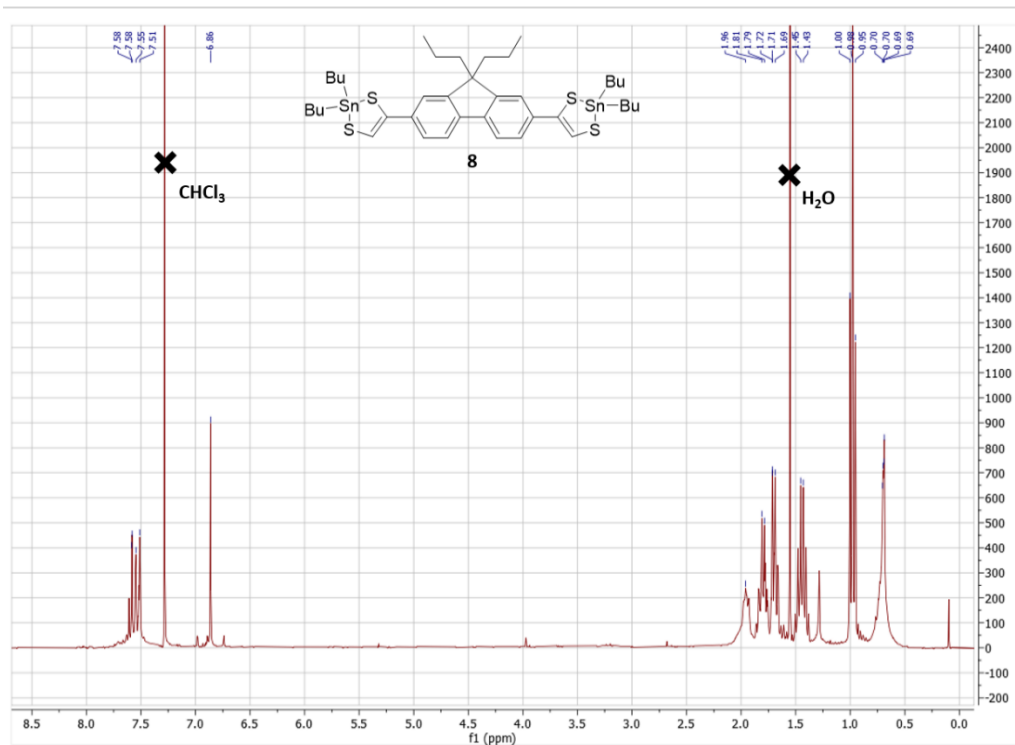

**Fig. S21: <sup>1</sup>H RMN of 8**

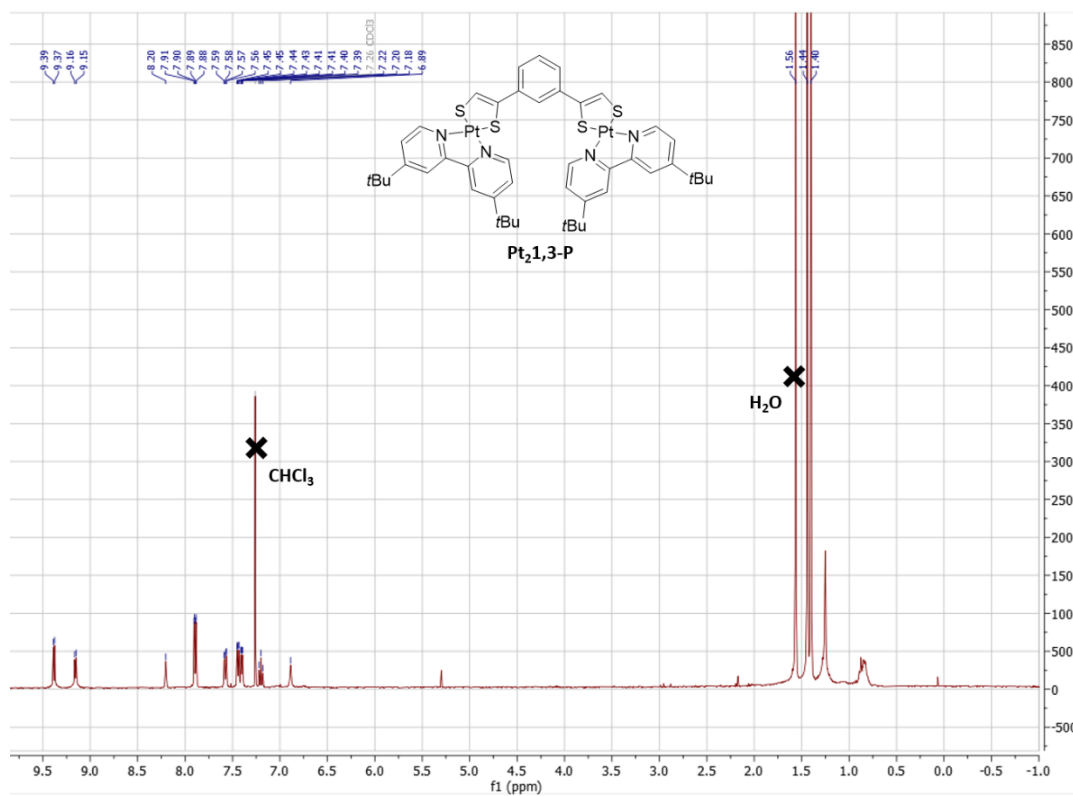

**Fig. S22: <sup>1</sup>H RMN of Pt<sub>2</sub>,1,3-P**

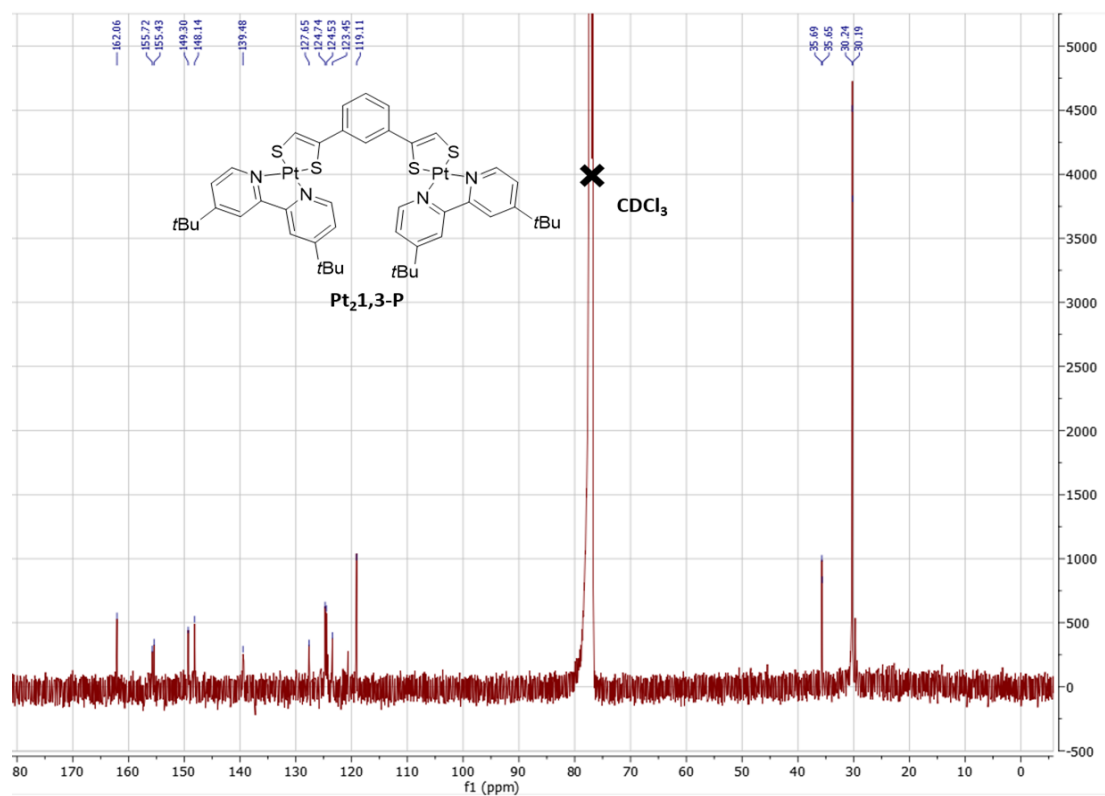

Fig. S23:  $^{13}C$  RMN of  $Pt_{2,1,3-P}$

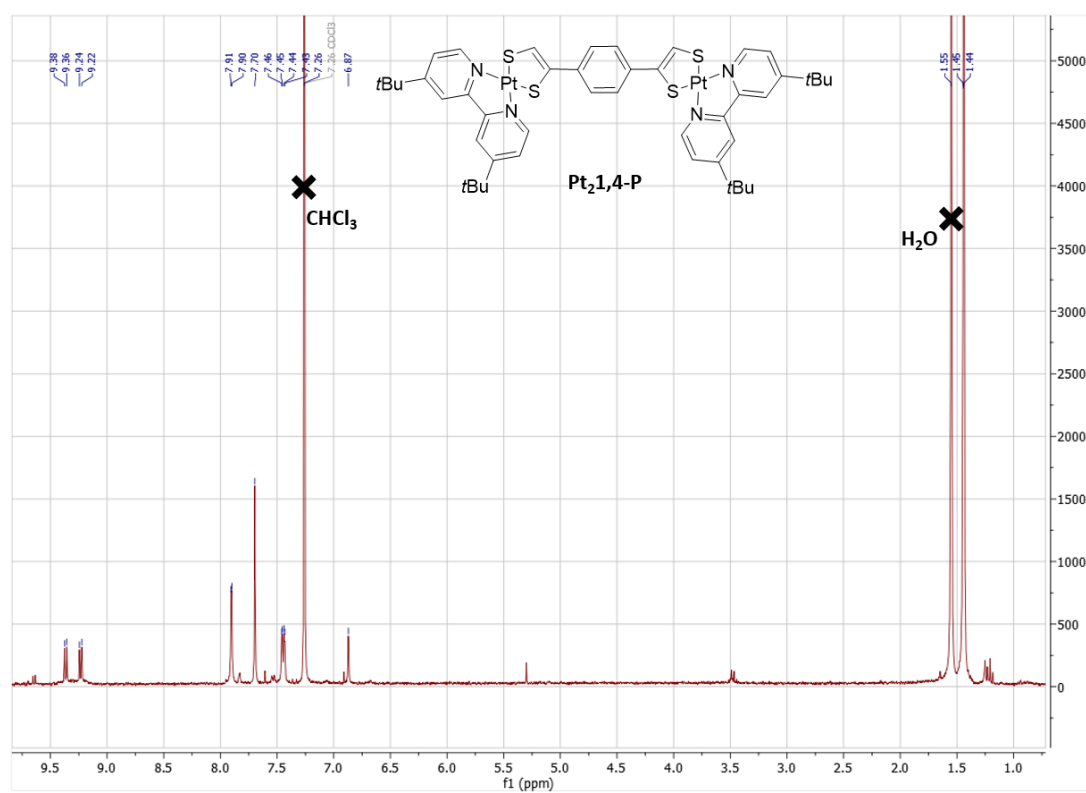

Fig. S24:  $^1H$  RMN of  $Pt_{2,1,4-P}$

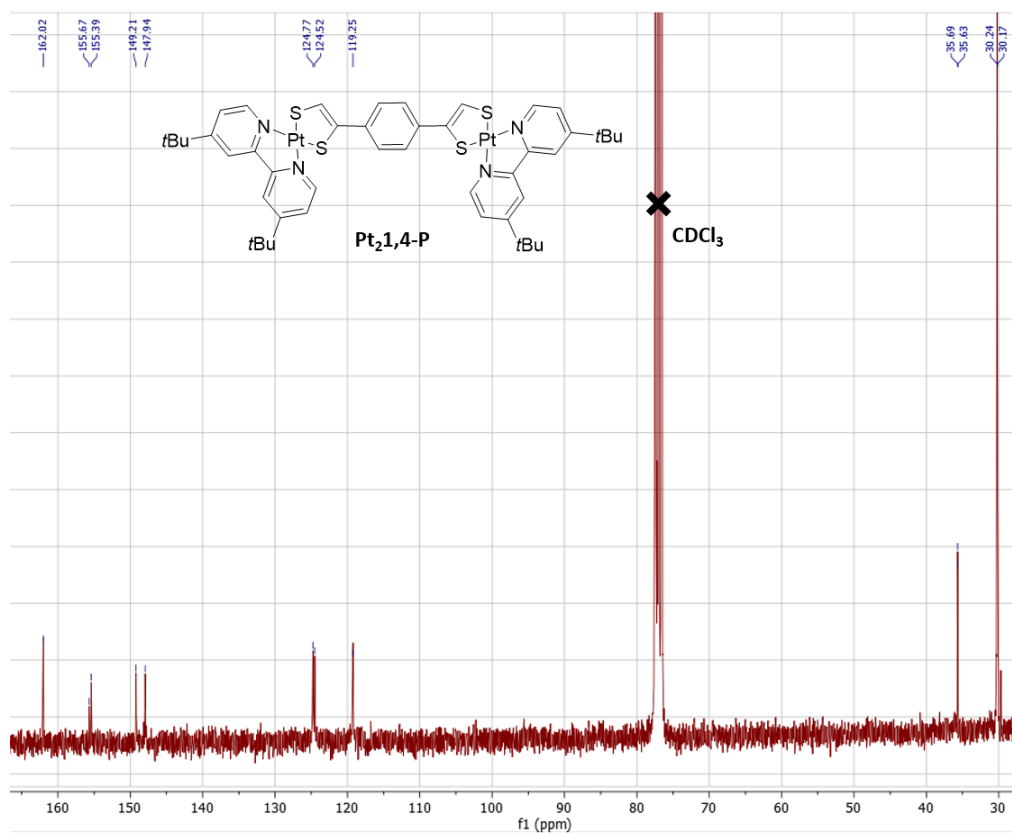

Fig. S25:  $^{13}\text{C}$  RMN of  $\text{Pt}_2,1,4\text{-P}$

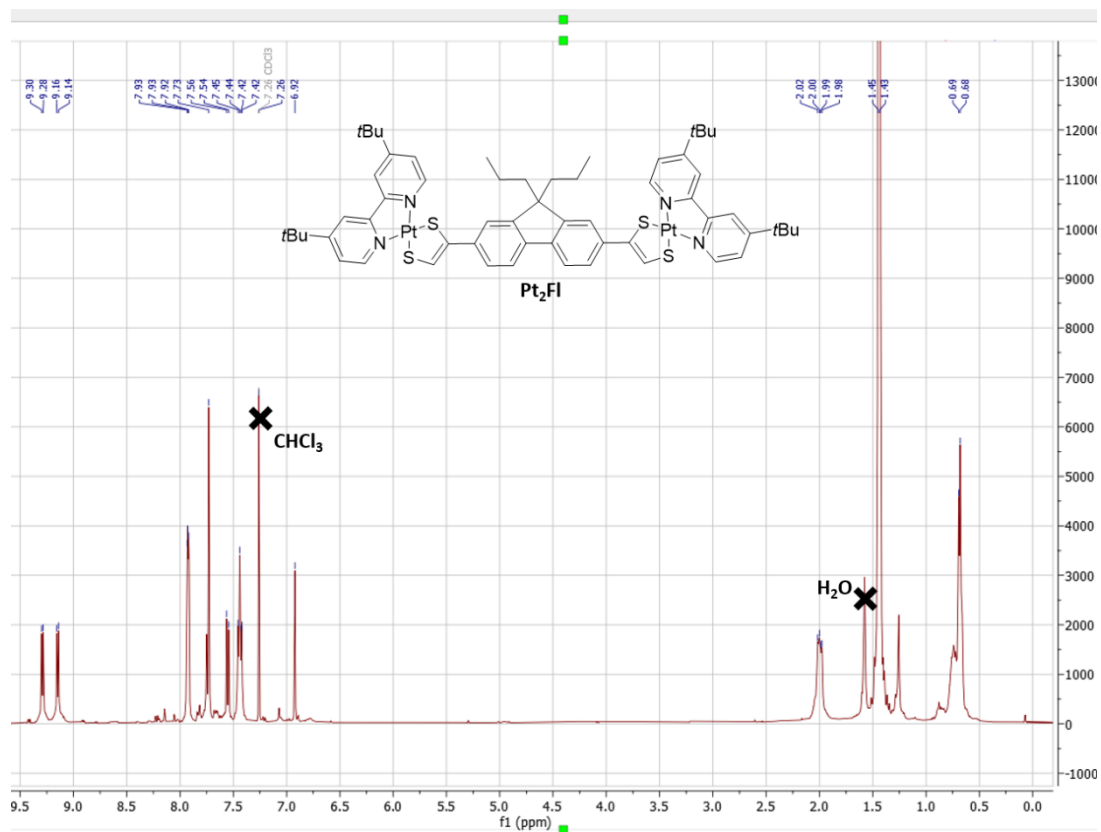

Fig. S26:  $^1\text{H}$  RMN of  $\text{Pt}_2\text{FI}$

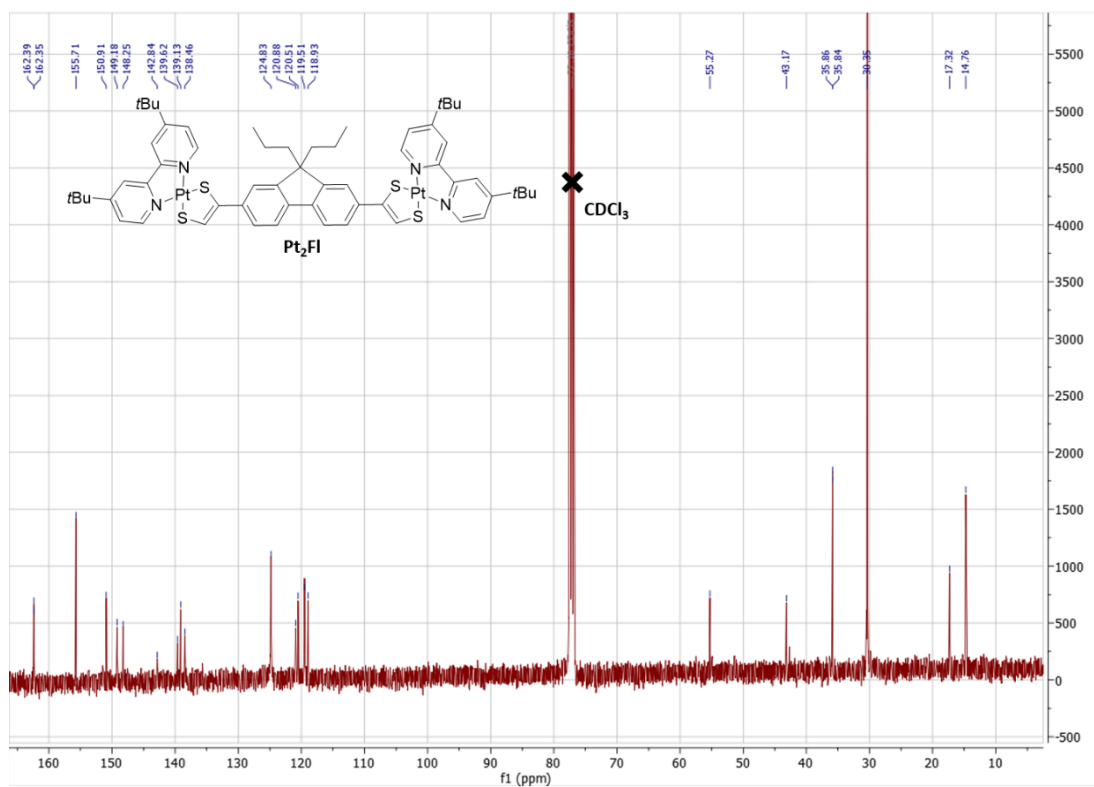

Fig. S27:  $^{13}\text{C}$  RMN of  $\text{Pt}_2\text{FI}$

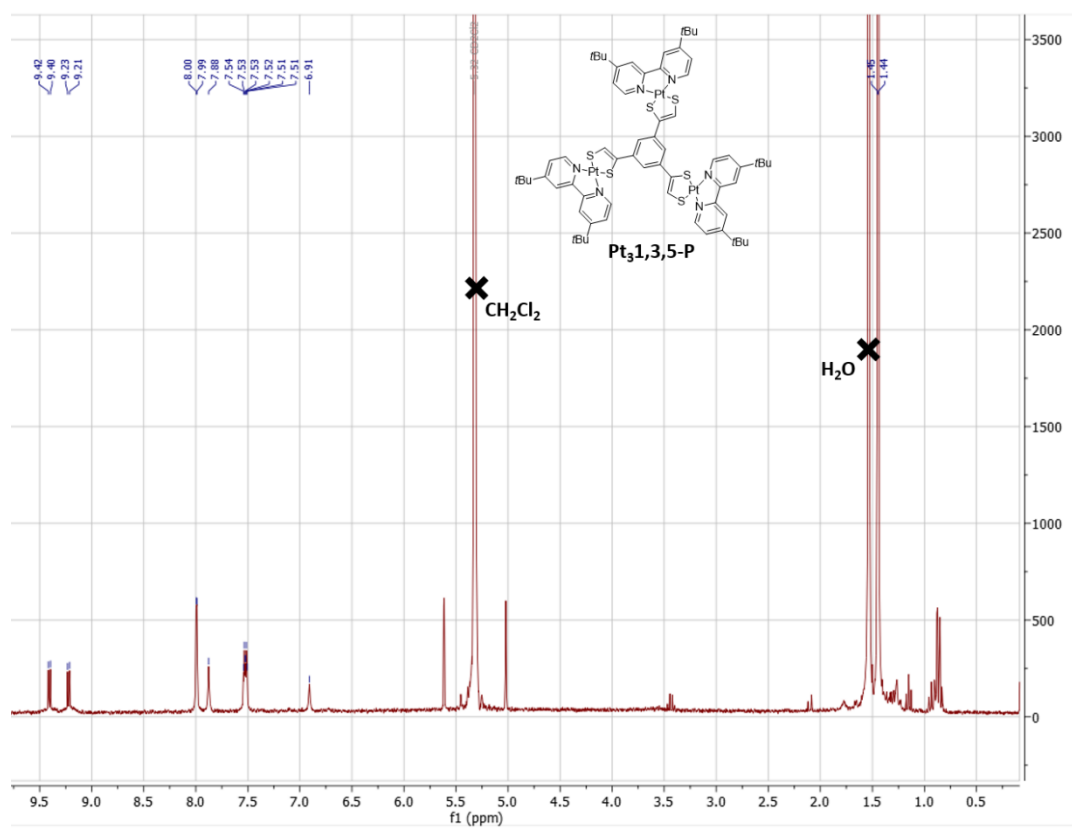

Fig. S28:  $^1\text{H}$  RMN of  $\text{Pt}_31,3,5\text{-P}$
